# Supplementary material for: Large-scale preparation of flexible and reusable surface-enhanced Raman scattering platform based on electrospinning AgNPs/PCL nanofiber membrane
Source: Royal Society of Chemistry journal article supplement (doi:10.1039/c7ra09726c), 2017-01-01
Supplement: c7ra09726c1.pdf [file c7ra09726c1.pdf]

## **Supporting Information**

### **Large-Scale Preparation of Flexible and Reusable Surface-Enhanced Raman Scattering Platform based on Electrospinning AgNPs/PCL Nanofiber Membrane**

Jihua Shi<sup>a</sup>, Tingting You<sup>a,\*</sup>, Yukun Gao<sup>a</sup>, Xiu Liang<sup>a</sup>, Chenling Li<sup>a</sup> and Penggang Yin<sup>a,\*</sup>

Key Laboratory of Bio-inspired Smart Interfacial Science and Technology of Ministry of Education, School of Chemistry, Beihang University, Beijing, China. E-mail: pgyin@buaa.edu.cn

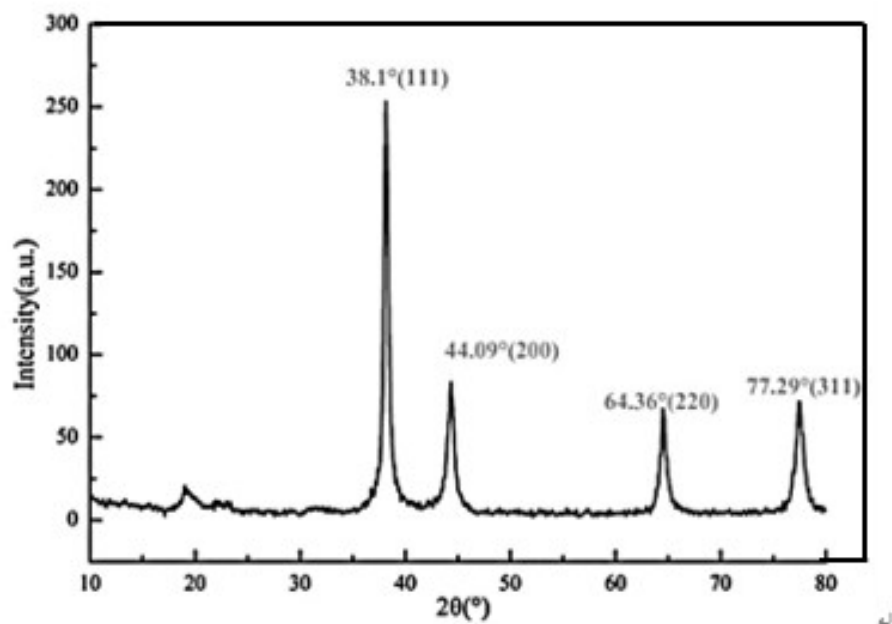

**Figure S1.** XRD spectrum of as-prepared AgNPs

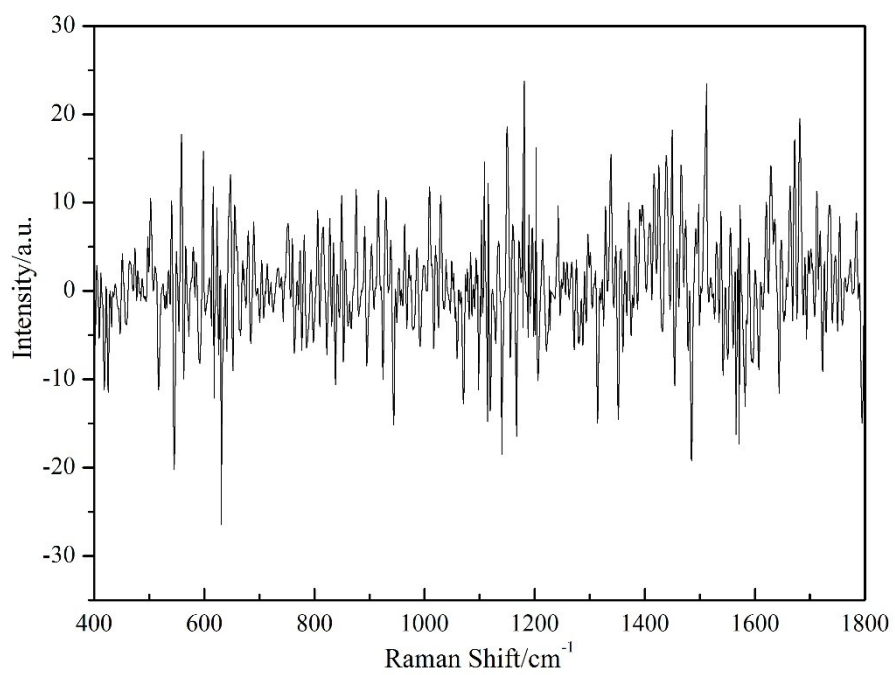

**Figure S2.** The Raman spectrum of AgNPs/PCL nanofiber membrane

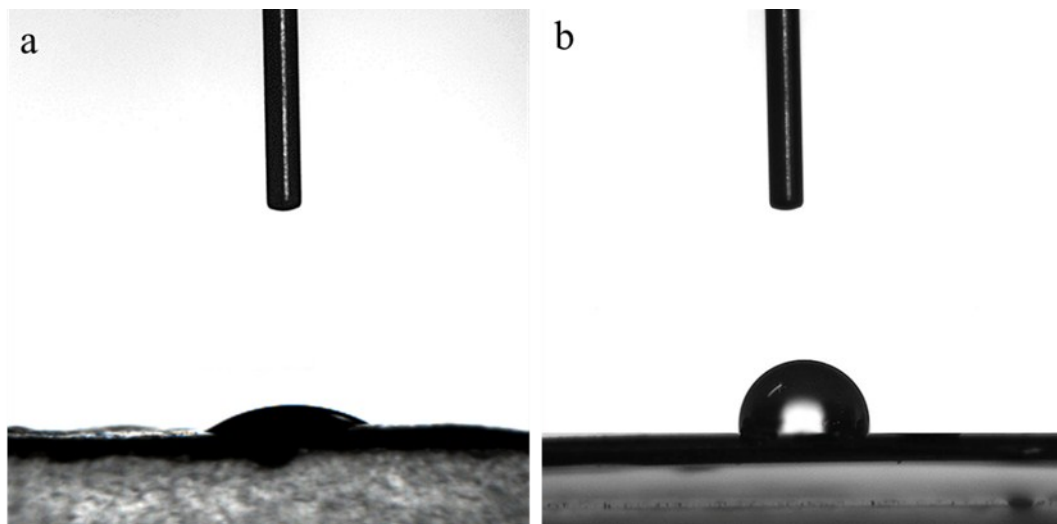

**Figure S3.** The contact angle of the AgNPs/PCL nanofiber membrane before (a) and after (b) etching.

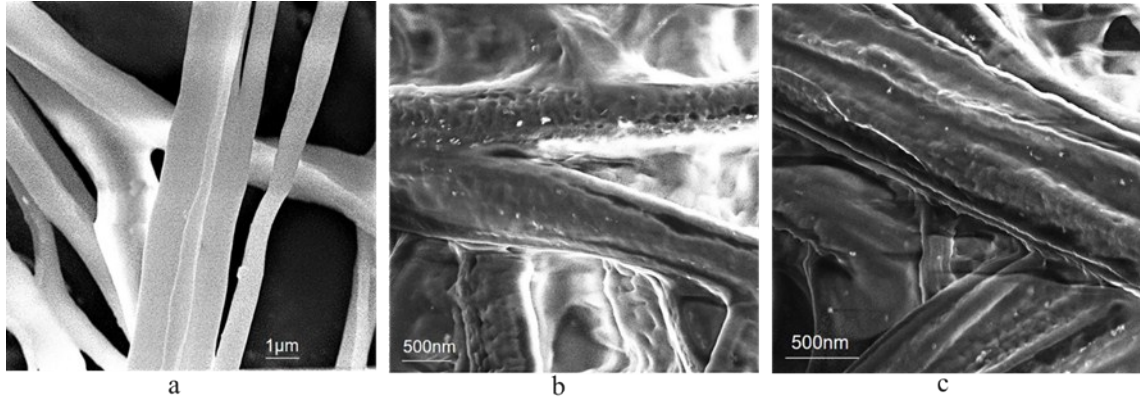

**Figure S4.** SEM images of the AgNPs/PCL nanofiber membrane before etching (a), after one etching (b) and double etching (c).
